# Supplementary material for: An Unexpected Regulatory Sequence from Rho-Related GTPase6 Confers Fiber-Specific Expression in Upland Cotton
Source: MDPI journal article supplement (doi:10.3390/ijms23031087), 2022-01-19
Supplement: s1 [file s1]

1 cagaactttc ttatttcact gtaatttcc ttttaattgc attttcgtc atcaatcat  
 61 tttatcgaa tcattaaaat acattattat taaaaaaca aataaatact taatttaaaa  
 121 ttttaaaaat atgtcatact tgaataaact caataagccc ttcaatgaac tttttaggt  
 181 taataataaa ataaataata aattatttat ggaaaatata ttgttgaat gtaagcagat  
 241 agctgtccaa gagctgtcct tcctttccct aatgattctc tctctttctt tcgggcaatg  
 301 tctttgatgt cttccagttt tacttagtcc ttcatcttct tcttcatttc agtgttttg  
 361 ggtttgtttt ttttcctact gtttggaca ataattgaag caagagataa ccttgggggc  
 421 ggcggcggag ggagaggaac atctctgaaa ttactttcac ttttccggt gggagtaaaa  
 481 tgagtgcac aaggttcac aaatgtgtca ctgttggtga cgggtgccgc gcgaagactt  
 541 gcatgctcat ctctacacc agcaataact tccctactgt gatttccaaa aagaaagaaa  
 601 ctaaccatt tttttgttt ggtctctgag aaaatatggg gaatggaaaa ggaagtgtg  
 661 ctggccctta acgttttctt tacttggtt atcatggatt ttcttttctt tttctttcc  
 721 tttttgttt ccctattttc ttggccacca agcagaccct acactggttt ctggtgttca  
 781 atgtaacttt ggtaaagtgt ctttctttat tgggtttttt ttgttttctt tttccattt  
 841 tgttgtactt gtotttggaa tcttgaattt gggcatagt atctttctga ataatagaat  
 901 cattcttctt aaattgtgtt caagttagca atttcttagg gttttttgct tcaaaaactt  
 961 gcagaaaatt tattgccttt ttgtgtttta taccttctta tttcttctgt ttgtgtttg  
 1021 atgatgcac atctaggata aagattctt gtctgttagg ttttcatttc aattagttag  
 1081 ttaaggtcaa aagttaaaac tggaaacatt atatcctgct actccctgt ttttgctgg  
 1141 aggagaaaga aaacaaattg ctaaatctga aactattgct ggtagaaagt ctcatttaga  
 1201 gatttcataa taggtgcttt cattactgog aatcttgggt ggatccccgg gtggtcagtc  
 1261 ccttATG

■ AuxRE ■ GARE ■ JARE ■ SARE ■ Spacer ■ Start code of GUS  
 nn Predicted 5'-UTR nn First exon nn Possibly removed sequence in RNA processing

Figure S1 Sequence information of the isolated GhROP6 promoter in the expression vector
